# Supplementary material for: Effect of mild hypothermia preconditioning against low temperature (4°C) induced rat liver cell injury in vitro
Source: PubMed Central journal article supplement (PMC5409157; doi:10.1371/journal.pone.0176652), 2017-04-28

Supplementary Figure 2

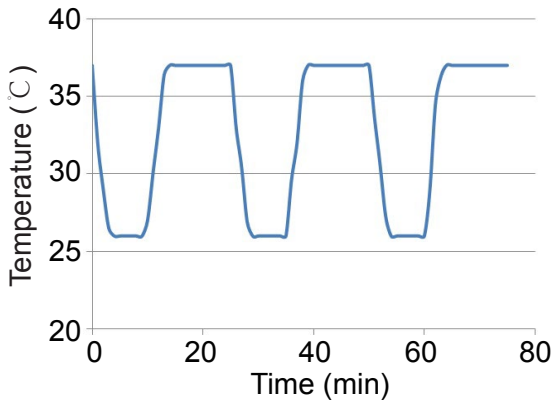

Supplement: pone.0176652.s002.pdf [file pone.0176652.s002.pdf]
